# Supplementary material
Source: PubMed Central journal article supplement (PMC6708464)

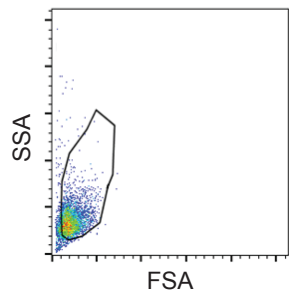

FSA

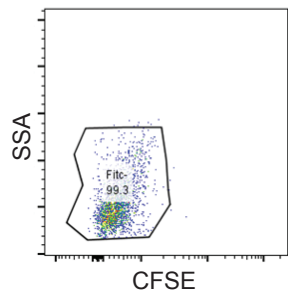

CFSE

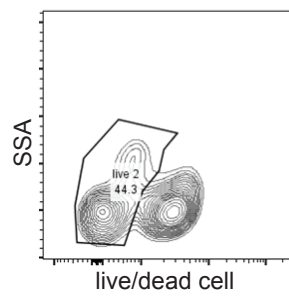

live/dead cell

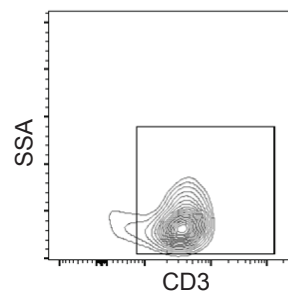

CD3

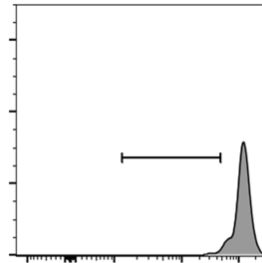

APC

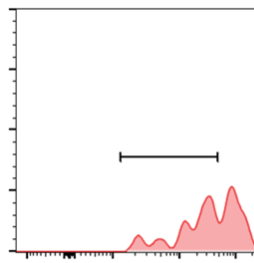

APC

Supplement: NIHMS1532744-supplement-1.pdf [file NIHMS1532744-supplement-1.pdf]

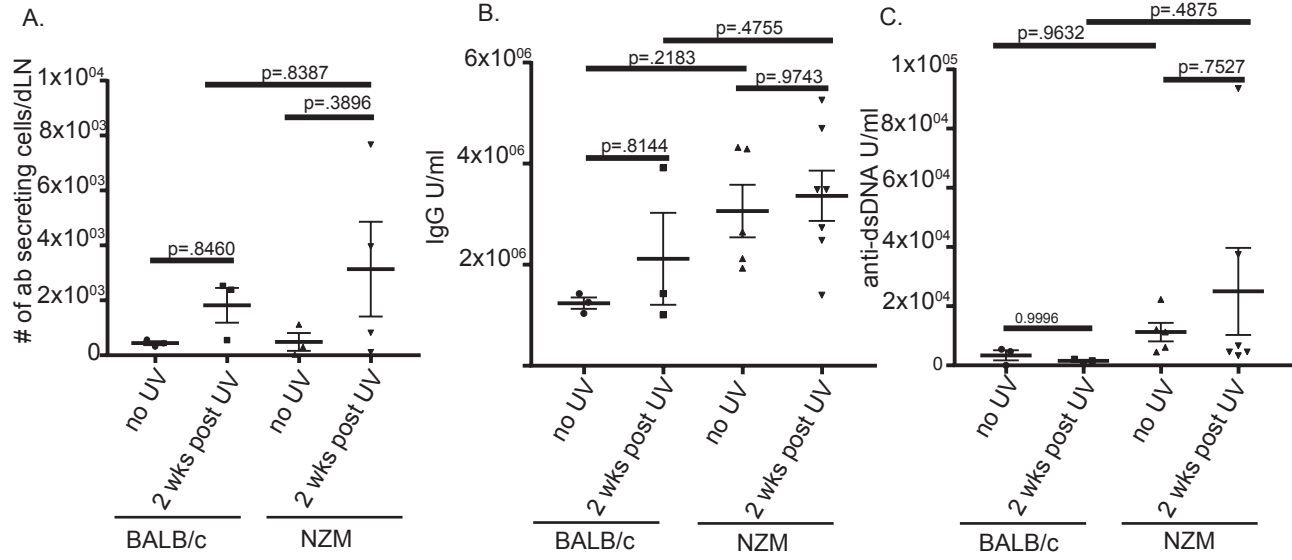

Supplement: NIHMS1532744-supplement-2.pdf [file NIHMS1532744-supplement-2.pdf]
